# Supplementary material for: A label-free amplified fluorescence DNA detection based on isothermal circular strand-displacement polymerization reaction and graphene oxide
Source: Royal Society of Chemistry journal article supplement (doi:10.1039/c3an00421j), 2013-01-01
Supplement: c3an00421j.pdf [file c3an00421j.pdf]

1 **Electronic Supplementary Information:**

2  
3  
4 **A label-free amplified fluorescence DNA detection based on**  
5 **isothermal circular strand-displacement polymerization**  
6 **reaction and graphene oxide**

7  
8 Zhen Li, Wenping Zhu, Jinwen Zhang, Jianhui Jiang\*, Guoli Shen, Ruqin Yu\*  
9

10  
11  
12 *State Key Laboratory of Chemo/Bio-Sensing and Chemometrics, College of*  
13 *Chemistry and Chemical Engineering, Hunan University, Changsha, 410082, P. R.*  
14 *China*

15  
16 To whom correspondence should be addressed.

17 Tel: +86 731 88822577.

18 Fax: +86 731 88822577.

19 E-mail address: rquy@hnu.edu.cn (R.-Q. Yu) jianhuijiang@hnu.edu.cn (J.-H.Jiang)

20  
21  
22  
23  
24  
25  
26  
27  
28  
29  
30  
31  
32  
33  
34  
35

## 36 **Experiment Section**

### 37 **Materials and reagents**

38 Klenow fragment (3'→5' exo<sup>-</sup>, KF), deoxyribonucleoside triphosphates (dNTPs)  
39 were purchased from New England Biolabs Ltd (Beijing, China). SYBR Green I (SG,  
40 10000×concentrate) was obtained from Dingguo Biochemical Reagents (Beijing,  
41 China). GO was synthesized by a modified Hummers' method.<sup>1</sup> DNA  
42 oligonucleotides used in this work were carefully designed by our team, and  
43 synthesized by Sangon Biotechnology Co. Ltd (Shanghai, China). The sequences of  
44 oligonucleotides are given in Table 1. All other purchased materials were used as  
45 received without further purification. All the reagents were prepared with ultrapure  
46 water (resistance > 18.2 MΩ.cm, prepared from Millipore Milli-Q water purification  
47 system) unless otherwise stated and deionized and sterilized ultrapure water was used  
48 throughout experiment. The buffer solutions used in this study were as following.  
49 Reaction buffer was 1×NEB buffer 2 (10 mM Tris-HCl, 10 mM MgCl<sub>2</sub>, 50 mM NaCl,  
50 1 mM DTT, PH 7.9), and detection buffer contains 10 mM Tris-HCl, 100 mM NaCl,  
51 and 5 mM MgCl<sub>2</sub> (pH 8.0).

### 52 **Assay procedures**

53 HP was firstly heated at 95°C for 5 min then being transferred onto the ice surface  
54 and kept for 10 min, the solution was diluted to 1 μM and kept at 4 °C for later use. In  
55 a typical assay, 3 μL HP (1 μM), 3 μL primer 1 (1 μM) and different concentrations of  
56 target DNA (3 μL) were firstly incubated in reaction buffer, followed by addition of  
57 2.5 units KF and 3 μL dNTPs (1mM), leading to a final reaction volume of 30 μL.

58 Subsequently, the above reaction mixture was kept at 37°C for 1 h. After that, SG (2  
59 µL, 100×) was added to stain the SDA products at room temperature for 10 min.  
60 Finally, 6 µL GO (200 µg/mL) and detection buffer were injected to give a final  
61 volume of 100 µL. After 10 min reaction time, the fluorescence spectra were  
62 recorded.

### 63 Instruments

64 All fluorescence measurements were carried out on a Hitachi F-7000 fluorescence  
65 spectrometer (Hitachi Ltd., Japan). The optical path length of a quartz fluorescence  
66 cell was 1.0 cm. Excitation and emission wavelengths were set at 497 and 525 nm,  
67 respectively, and the fluorescence spectra were recorded from 508-600 nm. Both the  
68 excitation and emission slits were set for 5 nm and PMT detector voltage was 800 V.  
69 All fluorescence detections were carried out under room temperature unless otherwise  
70 indicated.

71 **Table 1** Synthesized oligonucleotide sequences used in the experiments.

| Oligonucleotides | Sequence (5'→3')                                                  |
|------------------|-------------------------------------------------------------------|
| HP               | TAGAGAGAGAGAGAGAGTCTTGGACACAGTAAAGAGAG<br>GTGCGCCCATTGTGTCCAAGA-p |
| Target DNA       | ATGGGCGCACCTCTCTTTACTGTGTCTTT                                     |
| Primer 1         | TCTTGGAC                                                          |
| Primer 2         | TCTTGGACA                                                         |
| Primer 3         | TCTTGGA                                                           |
| T1-m             | ATGGGCGCACCTATCTTTACTGTGTCTTT                                     |
| T4-m             | ATGGGCTCACCTATCTTTAATGTTCTTT                                      |
| T-n              | TTCGTTCTCAATGAAGTGGGACGACA                                        |

72  
73 The mutation site is highlighted in red in target sequence. Letter “p” at the 3' end of  
74 HP sequence represents the phosphate.

75 **Table 2** Analytical performance comparisons of different assay methods for DNA.

| Method                                                | Linear range | LOD     | Ref       |
|-------------------------------------------------------|--------------|---------|-----------|
| Immobilization-free electrochemical DNA sensor        | 1-20 nM      | 0.1 nM  | 13        |
| Amplified electrochemiluminescence detection          | ~            | 10 pM   | 14        |
| Label-free fluorescent enzymatic amplification        | 0.6-3 nM     | 36 pM   | 26        |
| GO-based chemiluminescence biosensor                  | 0.1-3 nM     | 34 pM   | 22        |
| Multicolor fluorescent DNA analysis                   | 0-25 nM      | 100 pM  | 16        |
| GO-based molecular beacon                             | 5-500 nM     | 2 nM    | 15        |
| LrRET strategy                                        | 0.5-100 nM   | 0.31 nM | 17        |
| DNA-CdTe Quantum Dots                                 | 50-1600 nM   | 10.4 nM | 23        |
| Bifunctional oligonucleotide probe based fluorescence | 0.4-1000 nM  | 80 pM   | 24        |
| Label-free optical bifunctional oligonucleotide probe | 2-2000 nM    | 2 nM    | 25        |
| label-free amplified fluorescence detection           | 0.01-10 nM   | 4 pM    | This work |

76

77 LrRET: long-range resonance energy transfer; LOD: limits of detection.

## 78 **References**

79 1 Y. G. Li and Y. Y. Wu, *J. Am. Chem. Soc.*, 2009, **131**, 5851-5857.
